# Supplementary material for: Stretching DNA to twice the normal length with single-molecule hydrodynamic trapping
Source: Royal Society of Chemistry journal article supplement (doi:10.1039/c9lc01028a), 2020-01-01
Supplement: c9lc01028a1.pdf [file c9lc01028a1.pdf]

## Stretching DNA to twice the normal length with single-molecule hydrodynamic trapping

Yan Jiang<sup>1,2</sup>, Theodore Feldman<sup>1,3</sup>, Julia A.M. Bakx<sup>4</sup>, Darren Yang<sup>1,5</sup>, Wesley P. Wong<sup>1,2,5,6\*</sup>

<sup>1</sup>Program in Cellular and Molecular Medicine, Boston Children's Hospital, Boston, MA 02115, USA;

<sup>2</sup>Department of Pediatrics, Harvard Medical School, Boston, MA 02115, USA.

<sup>3</sup>VA Boston Healthcare System, Boston, MA 02130, USA.

<sup>4</sup>Department of Physics and Astronomy and LaserLaB, Vrije Universiteit Amsterdam, Amsterdam, The Netherlands.

<sup>5</sup>Wyss Institute for Biologically Inspired Engineering, Harvard University, Boston, MA 02115, USA.

<sup>6</sup>Department of Biological Chemistry and Molecular Pharmacology, Blavatnik Institute, Harvard Medical School, Boston, MA 02115, USA.

### Supplementary figures

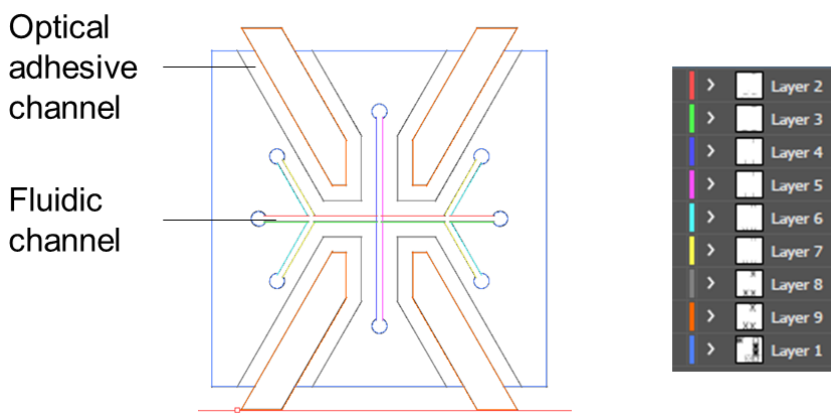

Supplementary Figure 1 Design pattern of the microfluidic chip for the hydrodynamic trap. The die cutter cut the pattern following the layers listed on the right from top to bottom.

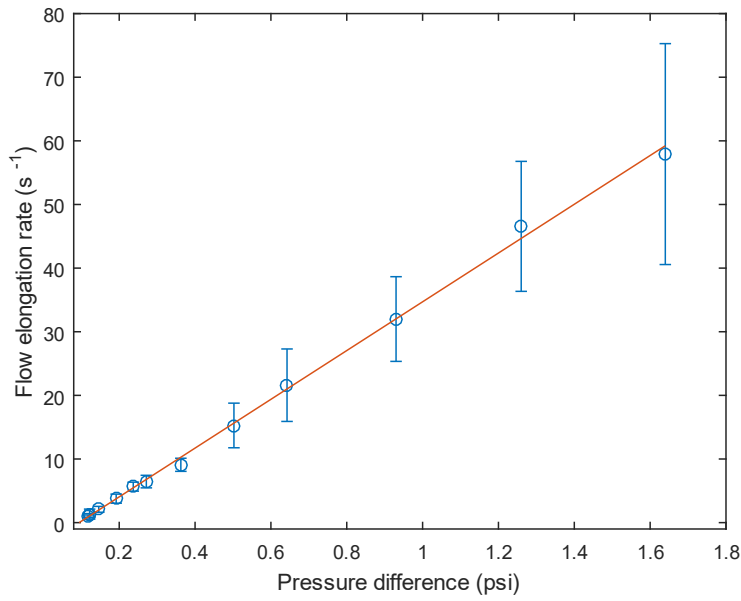

Supplementary Figure 2 The mean and standard deviation of the measured elongation rates as a function of the pressure difference between the buffer inlets and outlets.

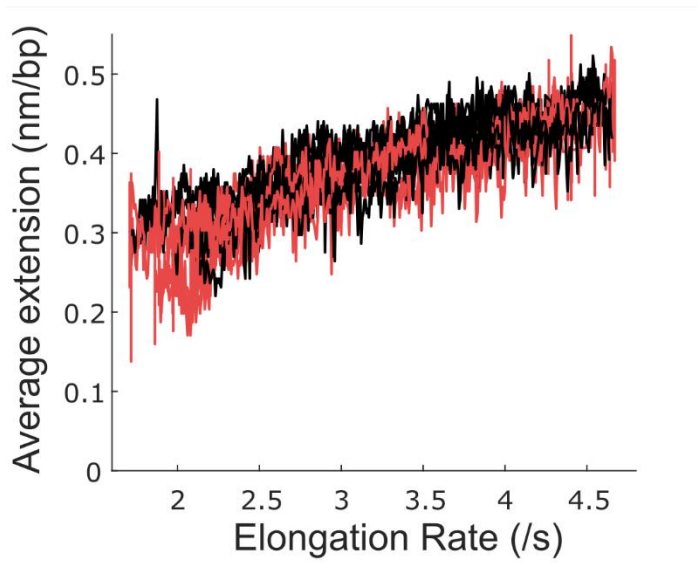

Supplementary Figure 3 DNA end-to-end distance as a function of flow elongation rate. The red curve is extension and the black curve is relaxation. Data from 10 experiments are overlaid.

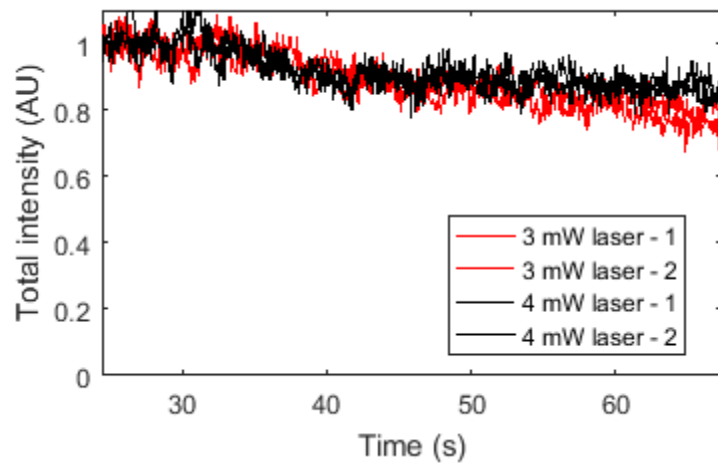

Supplementary Figure 4 Time traces of the total fluorescence intensity on DNA normalized to the initial intensity at two different laser illumination powers. The traces show little dependence on illumination intensity, suggesting that the decrease in intensity is most likely due to slow dissociation of intercalating dyes.

### Supplementary movie legends

Movie 1. 4:1 labelled dsDNA stretching and relaxing under elongational flow. The data shown in Figure 2 is from this experiment. Scale bar is 20  $\mu\text{m}$ .

Movie 2. 4:1 labelled dsDNA stretched using stepwise increasing elongation flow. The data shown in Figure 3 is from this experiment. Scale bar is 20  $\mu\text{m}$ .
